# Supplementary material
Source: Springer Nature journal article supplement (https://www.springermedizin.de/resource/supplementary/12888_2010_778_MOESM3_ESM.pdf/9478720)
Supplement: MOESM3 [file 9478720]

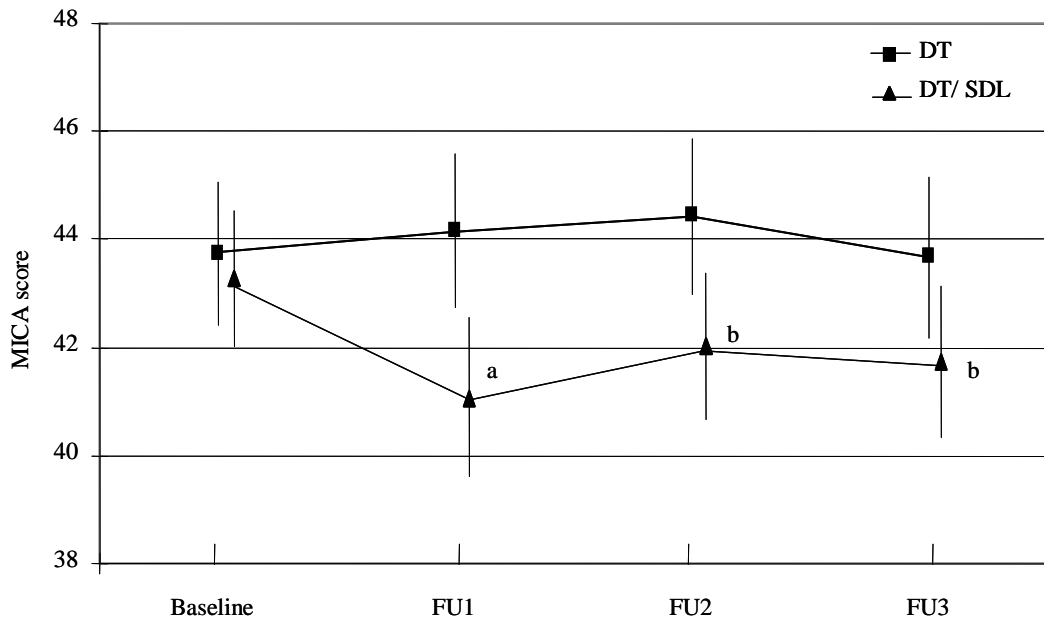

\* Group by time comparison adjusted by baseline value and gender.

Lower MICA score indicates better attitudes.

<sup>a</sup>  $P < 0.001$  compared with baseline

<sup>b</sup>  $P < 0.05$  compared with baseline

Note: the error bars represent 95% confidence intervals
